# Supplementary material for: Spectral attenuation of ocean waves in pack ice and its application in calibrating viscoelastic wave-in-ice models
Source: Copernicus journal article supplement (doi:10.5194/tc-14-2053-2020), 2020-06-24
Supplement: Supplementary file 1 [file tc-14-2053-2020-supplement.pdf]

Supplement of The Cryosphere, 14, 2053–2069, 2020  
<https://doi.org/10.5194/tc-14-2053-2020-supplement>  
© Author(s) 2020. This work is distributed under  
the Creative Commons Attribution 4.0 License.

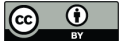

*Supplement of*

## **Spectral attenuation of ocean waves in pack ice and its application in calibrating viscoelastic wave-in-ice models**

**Sukun Cheng et al.**

*Correspondence to:* Sukun Cheng ([sukun.cheng@nersc.no](mailto:sukun.cheng@nersc.no))

The copyright of individual parts of the supplement might differ from the CC BY 4.0 License.

## Supplemental material

An example of fitting  $E(k_r, \theta)$  at a given  $k_r$  with the Gaussian distribution is shown in Figure 2(a), where  $\theta$  is measured counterclockwise from the positive range-axis in the range-azimuth domain. The directional ambiguity inherent in the SAR retrievals is removed with the aid of the in-situ observed wave direction

5 (Thomson et al., 2018).

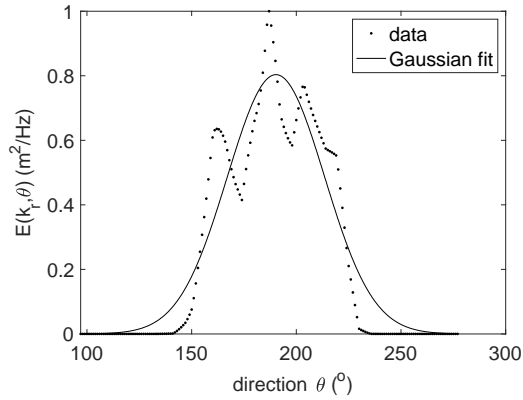

Figure S1. Demonstration of fitting the main wave direction  $\theta_{k_r}$  for  $k_r = 0.025\text{m}^{-1}$  by a Gaussian distribution.

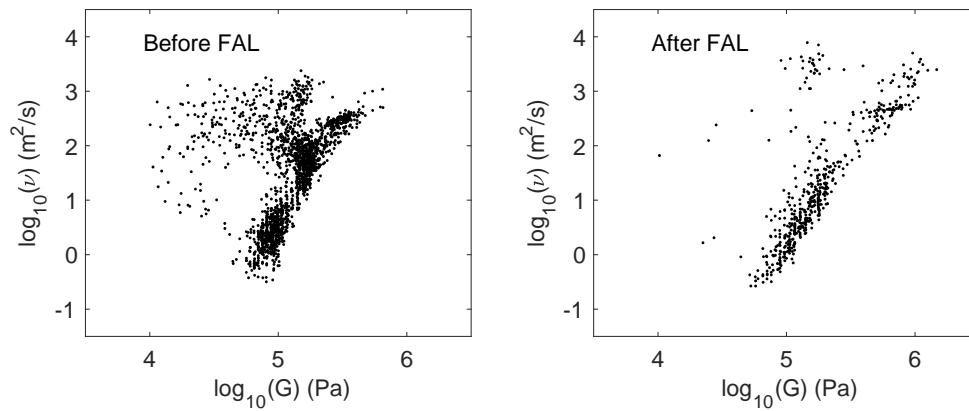

Figure S2. Scatter plots of calibrated  $G, \nu$  of the WS model after filtered outliers discussed in section 4.3.

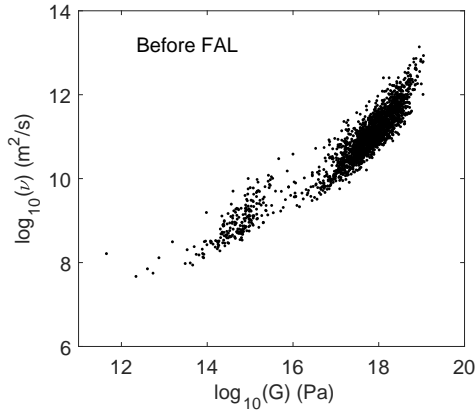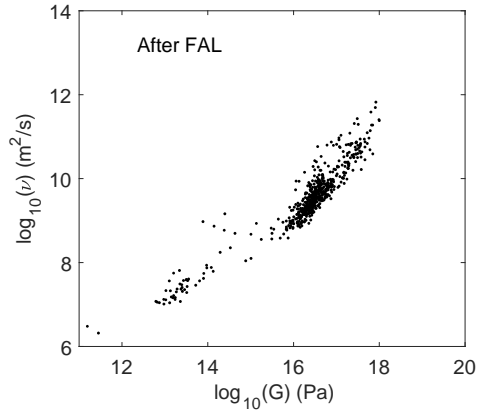

10

Figure S3. Scatter plots of calibrated  $G, \nu$  of the FS model.

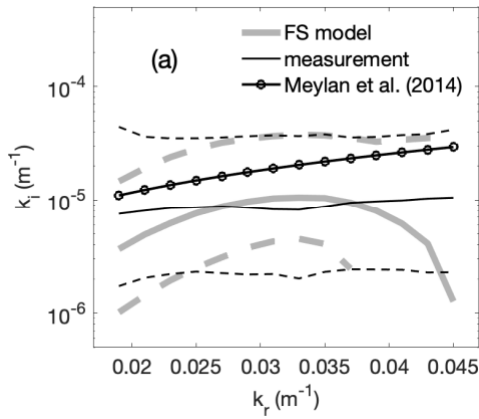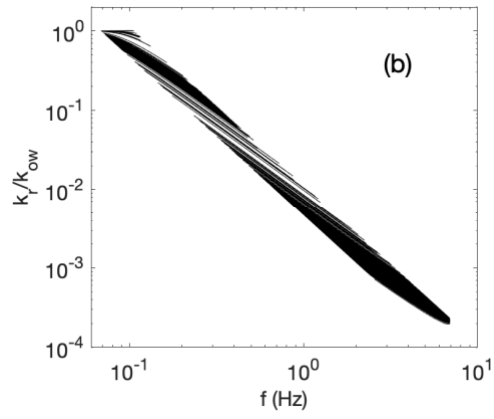

Figure S4. Similar as Figure 6 for the FS model.

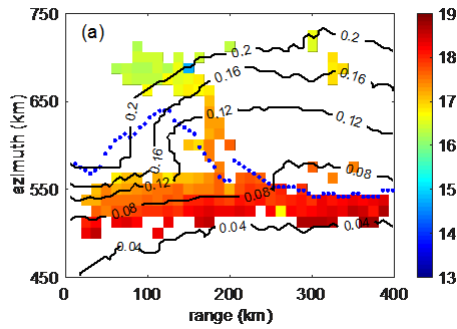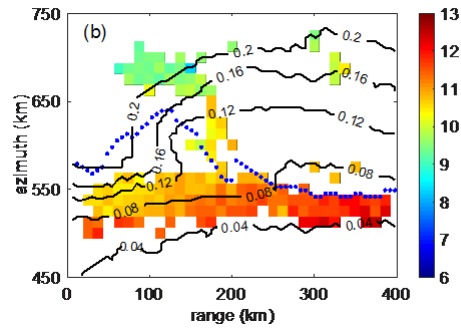

15

Figure S5. Similar as Figure 7 for the FS model, except blue dots is used to indicate the FAL
